# 1 **Speciation as a Sieve for Ancestral Polymorphism**

2 Rafael F. Guerrero<sup>1,\*</sup> and Matthew W. Hahn<sup>1,2</sup>

3 <sup>1</sup> Department of Biology, Indiana University, 1001 E Third St, Bloomington, IN 47405, USA

4 <sup>2</sup> School of Informatics and Computing, Indiana University, 1001 E Third St, Bloomington, IN 47405, USA

5 \* Corresponding author: rafguerr@indiana.edu

6

7 Keywords: balancing selection, genomic divergence, allopatric speciation, differential gene flow

8

9 Running title: Balanced polymorphisms sieved by speciation

10

11

12 Studying the process of speciation using patterns of genomic divergence between  
13 species requires that we understand the determinants of genetic diversity within  
14 species. Because sequence diversity in an ancestral population determines the starting  
15 point from which divergent populations accumulate differences (Gillespie & Langley  
16 1979), any evolutionary forces that shape diversity within species can have a large  
17 impact on measures of divergence between species. These forces include those both  
18 decreasing (e.g., selective sweeps (Begun *et al.* 2007; Cruickshank & Hahn 2014) or  
19 background selection (Phung *et al.* 2016)) and increasing variation (e.g., balancing  
20 selection (Charlesworth 2006)). Selection can increase diversity by favoring the  
21 maintenance of polymorphism via overdominance, frequency dependence, and  
22 heterogeneous selection. Nevertheless, balanced polymorphisms are considered rare in  
23 nature, and such loci are often overlooked as major contributors to genome-wide  
24 variation in levels of sequence diversity and divergence.

25 Here, we argue that speciation can act as a “sieve” that will reveal otherwise elusive  
26 balancing selection by sorting ancestral balanced polymorphisms unequally across  
27 descendent lineages. By sorting alternative alleles between different species, this  
28 process uncovers the existence of balancing selection in the ancestral population as  
29 regions of higher-than-expected divergence. Sorted ancestral polymorphism may also  
30 be responsible for many of the observed peaks of genomic divergence between closely  
31 related taxa, confounding studies of differential gene flow and “islands of speciation.”

## 32 **The effect of balancing selection on genetic diversity**

33 Balancing selection encompasses various, rather disparate, mechanisms that favor  
34 the maintenance of polymorphism. Most forms of balancing selection involve  
35 heterogeneous or variable selective forces: polymorphism is favored when selection  
36 varies across space or time (reviewed in Felsenstein (1976)), between the sexes  
37 (reviewed in Otto *et al.* (2011)), or as a function of allele frequency (negative frequency-  
38 dependent selection; reviewed in Ayala & Campbell (1974)). Balanced polymorphisms  
39 can also occur under constant selective pressures when heterozygotes have a fitness  
40 advantage over homozygotes (overdominance; (Wright 1931)).

41 Despite clear differences in their underlying mechanisms, all forms of balancing  
42 selection have qualitatively similar long-term effects on linked neutral variation.  
43 Genomic regions closely linked to loci under balancing selection are expected to show  
44 increased divergence between the allelic classes defined by the balanced  
45 polymorphism. This increase in divergence—the extent of which depends on population  
46 size, recombination rate, and strength of balancing selection—results from a population  
47 subdivision imposed by the balanced polymorphism. When two (or more) balanced  
48 alleles persist for a long time in a population, closely linked regions tend to accumulate  
49 differences between the allelic classes. Thus, the genealogies of samples linked to  
50 balanced polymorphisms resemble those of structured populations, with allelic classes  
51 acting as subpopulations and recombination allowing “gene flow” between these  
52 subpopulations. However, when the balanced alleles at a locus are not known, samples  
53 cannot be partitioned by allelic class. This makes it difficult to quantify the increased

54 divergence between allelic classes directly (for example, using the statistic  $F_{ST}$ ).  
55 Instead, the only observable signals of balanced polymorphism are an excess of  
56 intermediate frequency alleles (detected using Tajima's  $D$ ), or overall increases in  
57 diversity (detected using the average number of pairwise differences, or  $\pi$ ).  
58 Unfortunately, the large amount of variance in both  $D$  and  $\pi$  associated with even  
59 neutrally evolving loci means that loci under balancing selection are hard to detect  
60 (Simonsen *et al.* 1995).

61 The potential difficulty in detecting balanced polymorphism is somewhat alleviated in  
62 cases of local adaptation. Because alternative balanced alleles differ in frequency  
63 between the populations where they are individually advantageous, measures of  
64 differentiation between populations can be used as a proxy for divergence between  
65 allelic classes. Moreover, actual population structure can lower the effective  
66 recombination rate between allelic classes, exacerbating their divergence. Perhaps due  
67 to its increased detectability, spatially varying selection is reported in natural populations  
68 much more frequently than other forms of balancing selection (Asthana *et al.* 2005;  
69 Charlesworth 2006; Fan *et al.* 2016). Indeed, while overdominance and negative  
70 frequency-dependence continue to be considered rare, local adaptation is considered  
71 pervasive, and is even a compulsory first step in some models of speciation (Nosil  
72 2012).

### 73 **The sieve: ancestral lineage sorting after speciation**

74 Consider a simple case of allopatric speciation: a single population is split in two by  
75 vicariance (*e.g.*, the rise of a mountain range or the construction of a thousand-mile

76 wall). For neutral biallelic polymorphisms in the ancestral population, drift will fix  
77 alternative alleles in the two nascent species at half of all such loci (the rest of the time  
78 both species will fix the same allele). In the presence of balancing selection,  
79 expectations can differ. Balancing selection may favor the maintenance of  
80 polymorphism in both nascent species (resulting in ‘trans-specific polymorphism’;  
81 (Muirhead *et al.* 2002)), or increase the chance that alternative alleles are fixed. For  
82 instance, when selection varies across space, a geographic barrier is likely to create  
83 two unequal ranges (*i.e.*, areas with different proportions of habitats driving local  
84 adaptation)—these unequal habitat ranges may favor dramatically different equilibrium  
85 frequencies at the locally adapted loci in the nascent species. This could result in  
86 selection favoring the fixation of opposite alleles in each species, sieving ancestral  
87 alleles in the descendant lineages (Figure 1A).

88 Sieved balanced polymorphisms carry the signature of selection in the form of  
89 increased sequence divergence between the descendant species. Immediately after the  
90 split, the level of genetic divergence is largely determined by the diversity present in the  
91 ancestral population. Formally, this can be seen in the expectation of absolute  
92 divergence:  $E(d_{XY})=2\mu t+\theta_{Anc}$  (Gillespie & Langley 1979). As the time since the species  
93 split ( $t$ ) approaches zero,  $E(d_{XY})$  becomes approximately equal to the ancestral level of  
94 diversity,  $\theta_{Anc}$  ( $=4N_e\mu$  for diploids, where  $N_e$  is the effective population size and  $\mu$  is the  
95 neutral mutation rate). Initial levels of divergence are therefore strongly affected by  
96 forces that affect levels of ancestral neutral diversity, such as balancing selection. In  
97 regions linked to sieved balanced polymorphism, measures of divergence between

98 species (such as  $d_{XY}$  or  $F_{ST}$ ) reflect the divergence accumulated between allelic classes  
99 both in the ancestor and since the lineages split, so sieved polymorphisms maintained  
100 in the ancestor for a long time can appear as regions of elevated divergence between  
101 nascent species.

102 Interestingly, this implies that balancing selection could be more readily detected  
103 after speciation (as a sieved polymorphism with elevated  $d_{XY}$ ) than in the ancestor when  
104 the causal alleles are unknown (using  $D$  or  $\pi$ ; Figure 1B). Indeed, the signature of  
105 balancing selection is expected to be twice as strong on  $d_{XY}$  than on  $\pi$  at loci with alleles  
106 maintained at equal frequencies in the ancestor (Figure 1C; see Supplement). As either  
107 allele becomes rarer, the effect is more severe: when the minor allele frequency was  
108 10% in the ancestor, the increase in  $d_{XY}$  is expected to be almost ten times larger than  
109 the increase in  $\pi$ . Therefore, by separating the relevant haplotypes, speciation can  
110 dramatically increase our power to find loci under balancing selection.

### 111 **Relevance of sieved polymorphisms during recent genomic divergence**

112 The prevalence of sieved polymorphisms in nature is unknown (and is probably low),  
113 but the importance of this phenomenon for observed patterns of genomic divergence  
114 does not stem from its frequency. The amount of balanced polymorphism sieved by  
115 speciation is proportional to the fraction of loci under balancing selection in the ancestor  
116 and the probability of fixing alternative alleles at those loci (which depends on the mode  
117 of selection operating at each locus). If balancing selection is as rare as usually  
118 assumed (Charlesworth 2006), sieved polymorphisms are likely to be uncommon and  
119 would not drastically elevate average levels of divergence. Instead, the few instances of

120 sieved polymorphisms will have subtle but significant repercussions: these regions will  
121 tend to appear at the top of the distribution of divergence across the genome, ‘fattening’  
122 its upper tail and potentially affecting further inferences. The potential consequences for  
123 the distribution of divergence depend not only on the fraction of loci sieved, but also on  
124 parameters specific to each polymorphism (namely, its age, strength of selection, and  
125 recombination rate). If, for instance, a genome carries only one sieved polymorphism, it  
126 will likely appear as a divergence outlier. On the other hand, a higher fraction of sieved  
127 regions—caused, for instance, by numerous locally adapted alleles differentiated  
128 between populations prior to speciation—will considerably fatten the upper tail in the  
129 divergence distribution. Such an observation could be interpreted as evidence of a  
130 period of differential gene flow following an initial split (*cf.* Yang et al. (2017)). This latter  
131 case highlights the fact that sieved polymorphism can mimic the signature of other  
132 evolutionary processes, and distinguishing among these may be challenging without  
133 additional pieces of evidence (see below).

134 Recent findings suggest that sieved polymorphisms do play an important role in  
135 shaping patterns of genomic divergence. Multiple studies have found regions with levels  
136 of divergence so high that differentiation at these loci almost certainly started before  
137 speciation, consistent with ancestral balanced polymorphism. In these cases, the timing  
138 of speciation—or at least a bound on the timing—can be independently estimated,  
139 highlighting the mismatch between species divergence and genetic divergence.

140 In the radiation of Darwin’s finches, speciation events happened roughly between 50  
141 to 500 thousand years ago (Lamichhaney *et al.* 2015), yet some genomic regions seem

142 to have started differentiating well before then (up to one million years ago; (Han *et al.*  
143 2017)). At least two of these genomic regions, linked to loci associated with beak shape  
144 and size (genes *ALX1* and *HMGA2*), are likely sieved polymorphisms. Across the nine  
145 species of tree and ground finches studied, these loci have two distinct haplotype  
146 classes (*i.e.*, there is high divergence between classes and reduced divergence within  
147 class, even between species) that are responsible for marked phenotypic differences  
148 (blunt vs. pointed beaks, and small vs. large beaks). As a result, species pairs that have  
149 fixed different haplotype classes show 'islands of divergence' at these loci. As  
150 hypothesized by Han *et al.* (2017), however, this beak polymorphism was probably  
151 balanced in the ancestor (perhaps under negative frequency-dependent selection) and  
152 was later sieved across the Galapagos (Han *et al.* 2017).

153 In the freshwater threespine sticklebacks of western North America, the *Eda* locus  
154 represents a clear example of how ancestral polymorphisms can emerge as  
155 conspicuous peaks of genomic divergence. Polymorphism at *Eda* has been maintained  
156 in marine populations for approximately two million years, and the minor allele has been  
157 selected repeatedly during colonization events of glacier lakes around ten thousand  
158 years ago (Colosimo *et al.* 2005). Expectedly, *Eda* shows dramatic differentiation  
159 between marine and freshwater populations, but most of this divergence happened  
160 before the invasion of the glacier lakes and is unrelated to recent processes.

161 Other types of polymorphism can also be sieved. Among these, chromosome  
162 rearrangements (*e.g.*, inversions, fusions) are of special interest for their role during  
163 local adaptation. Rearrangements can evolve by capturing locally adapted alleles



164 (Kirkpatrick & Barton 2006; Guerrero & Kirkpatrick 2014), and established  
165 rearrangements can promote further local adaptation (Navarro & Barton 2003).  
166 Moreover, balanced rearrangements (especially inversions) are usually conspicuous in  
167 population genomic data (*e.g.*, (Cheng *et al.* 2012; Kapun *et al.* 2016)), as they typically  
168 cause a dramatic reduction in recombination, which in turn leads to much stronger  
169 population subdivision compared to other balanced polymorphisms (Guerrero *et al.*  
170 2012; Guerrero & Kirkpatrick 2014). Due to their role in local adaptation and their large  
171 genomic footprint, rearrangements are thought to be key players in the buildup of  
172 differentiation that can lead to speciation. Some chromosome inversions have in fact  
173 been linked to speciation processes (*e.g.*, in cactophilic *Drosophila* (Lohse *et al.* 2015),  
174 *Mimulus* (Fishman *et al.* 2013)). In other cases, however, locally adapted inversions are  
175 maintained as polymorphisms within a species or as trans-specific polymorphisms –  
176 without being involved in speciation. In the *Anopheles gambiae* species complex,  
177 inversion *2La* arose in the ancestor of six species (well before the most recent  
178 speciation events) and it is still polymorphic in two of these (Fontaine *et al.* 2015). This  
179 inversion has been sieved at least two times, such that comparisons between species  
180 fixed for alternative arrangements show increased divergence across many megabases  
181 of sequence.

182

## 183 **Implications for inferences of speciation islands and speciation-with-gene-** 184 **flow**

185 Many of the patterns described above for sieved polymorphisms mimic predictions of  
186 models of speciation with gene flow. In the most common version of this model (which is  
187 conceptually similar to sympatric and parapatric speciation models; reviewed in (Bush  
188 1975; Via 2001)), populations have uninterrupted exchange of migrants, but achieve  
189 total reproductive isolation gradually by the accumulation of locally adapted loci that limit  
190 effective migration (*cf.* Charlesworth *et al.* (1997)). At the genomic level, differential  
191 effective migration is expected to leave a clear signature: regions linked to loci under  
192 divergent selection (*a.k.a.* local adaptation) accumulate higher divergence compared to  
193 the rest of the genome, appearing as ‘genomic islands of speciation’ (Turner *et al.*  
194 2005). Variation in divergence across the genome has therefore been attributed to  
195 differential migration among loci, with individual loci showing much higher levels of  
196 divergence implicated as being causal in the speciation process. Several studies initially  
197 reported finding such islands using relative measures of divergence (such as  $F_{ST}$ ),  
198 which can be affected by selection in the sampled populations (*e.g.*, (Turner *et al.* 2005;  
199 Geraldes *et al.* 2011; Ellegren *et al.* 2012)). Because absolute measures of divergence  
200 (such as  $d_{XY}$ ) are unaffected by current levels of polymorphism, it was suggested that  
201 these would be preferred in identifying regions that are truly resistant to introgression  
202 (Cruickshank & Hahn 2014). It has therefore become more common to search for  
203 islands using  $d_{XY}$  and related statistics, and some researchers have reported finding  
204 these important loci (*e.g.*, (Malinsky *et al.* 2015; Marques *et al.* 2016)).

205 Using absolute measures of divergence does not obviate the problem of variation in  
206 levels of diversity in the ancestral population. As discussed above, regions of elevated  
207  $d_{XY}$  can be produced by balanced polymorphisms in ancestral populations, and variance  
208 in levels of divergence across the genome can be driven by variance in diversity in  
209 these ancestral populations. It is simply not true that all loci start out equally diverged at  
210 speciation, or that differential migration is the only force that can produce variation in  
211  $d_{XY}$  beyond that expected from neutral coalescent variation in the ancestor.

212 How would one distinguish between true islands and sieved balanced  
213 polymorphisms? One commonality shared by the clearest examples of sieved  
214 polymorphisms given above is that independent estimates exist for the earliest time  
215 when speciation could have started. Glacial lakes that could not have existed prior to  
216 the retreat of the glaciers, radiations onto geological features (such as oceanic islands)  
217 that recently appeared on the landscape, or simply the date of an earlier divergence  
218 from a more distantly related species, all limit the maximum time pairs of focal species  
219 could have been separated. Given such limits, we can then contrast hypotheses of  
220 speciation-with-gene-flow with those involving sieved polymorphisms (Figure 2). In fact,  
221 it takes quite a long time for loci resistant to gene flow to appear as divergence outliers  
222 under models of speciation-with-gene-flow (Figure 2A; also see Fig. B1 in Cruickshank  
223 and Hahn 2014). By contrast, sieved balanced polymorphisms can be detected almost  
224 immediately by both relative and absolute measures of divergence, and ironically these  
225 signals are stronger in  $F_{ST}$  than  $d_{XY}$  (Figure 2B).

226 We can apply these ideas to assess the likely causes of “islands of divergence” in  
227 previously published examples. In the cichlids of Lake Massoko, for instance, levels of  
228 divergence might stem from ancestral polymorphism (Malinsky *et al.* 2015). The  
229 speciation process in the focal pair started some 3500 generations ago (Malinsky *et al.*  
230 2015), which would allow enough time for the accumulation of divergence on the order  
231 of  $d_{XY}=1.05 \times 10^{-4}$  (assuming  $\mu=1.5 \times 10^{-8}$  and  $\theta_{Anc}=0$ ). However,  $d_{XY}$  observed in the most  
232 highly diverged regions is considerably higher than this expectation (mean  $d_{XY}=9 \times 10^{-4}$ ;  
233 <https://twitter.com/millanek1/status/758209899964862465>), suggesting that a large  
234 fraction of the observed differentiation is due to ancestral diversity. This rough  
235 calculation ignores many factors, such as variation in mutation rate, that can contribute  
236 to the observed patterns. However, it allows us to emphasize that the genomes of  
237 extant populations give us a glimpse into ancestral processes that transcend the most  
238 recent speciation event.

239 Similarly, in the threespine stickleback of Lake Constance, subspecies show several  
240 regions of divergence that most likely predate the current process of local adaptation  
241 (which started about 150 generations ago), and for which standing variation has been  
242 invoked as a probable source (Marques *et al.* 2016). In this case, high differentiation  
243 was inferred in 37 genomic regions based on allele frequency differences among  
244 populations (using SNPs obtained via RAD-seq). The observed diversity levels in these  
245 regions are not significantly reduced, suggesting that—while current selection may be  
246 driving allele frequency divergence—the accumulation of divergent SNPs is not the

247 result of a recent sweep. Rather, many of these “islands” are likely ancestral balanced  
248 haplotypes currently being sorted.

249 Confounding sieved polymorphism with islands of speciation can lead to an  
250 additional erroneous inference. The observation of large amounts of variation in  
251 divergence time among loci may lead to the conclusion that gene flow has occurred,  
252 when none has. To some extent, these inferences follow from the observation of  
253 islands—if there are loci resistant to gene flow, then it follows that there must have been  
254 gene flow. But this false signal can also affect methods for inferring gene flow that  
255 assume that there is no selection, and therefore interpret the excess variance observed  
256 as due to migration. It has recently been recognized that modeling the effects of  
257 selection on the levels of sampled polymorphism is important in controlling such false  
258 positives (Roux *et al.* 2016). The implication here is that variation in levels of ancestral  
259 polymorphism must also be considered, since they can lead to false inference of gene  
260 flow and current selection (*i.e.*, labeling sieved regions, which may be neutral now, as  
261 resistant to gene flow).

## 262 **Conclusions**

263 Sieved polymorphism—in conjunction with factors such as population structure,  
264 assortative mating, background selection, or variation in mutation and recombination  
265 rates—contributes to heterogeneity in genomic divergence levels. Due to the complexity  
266 of the divergence distribution, inferences that rely solely on its outliers (*e.g.*, taking an  
267 arbitrary upper quantile of  $d_{XY}$  as speciation islands) can yield misleading results by  
268 selecting regions, such as sieved polymorphisms, that are unrelated to speciation.

269 Model-based analyses are necessary but not sufficient, because extremely similar  
270 patterns of genomic divergence can be generated by alternative models of speciation.  
271 In fact, biologically significant differences between speciation models are occasionally  
272 irrelevant from a theoretical standpoint (*e.g.*, cessation of gene flow is modeled  
273 identically [ $m=0$ ] regardless of the mechanism behind it, whether due to hybrid  
274 inviability, a geographic barrier, or other). For this reason, independent lines of evidence  
275 are critical to disentangle the multiple forces at play. For instance, having a lower bound  
276 on the time since speciation can allow us to determine how much ancestral  
277 polymorphism is expected, since its effect is strongest in recent speciation events (*i.e.*,  
278  $t < 2N_e$ , when  $\theta_{Anc}$  accounts for more than half of  $E(d_{XY})$ ). Using current levels of  
279 polymorphism as a proxy for ancestral levels in model-based analyses will also be a  
280 useful starting point in trying to understand the causes of variation in divergence levels.  
281 Finally, a search for the signals of a speciation sieve applied across the many new  
282 whole-genome datasets being produced may cause us to reconsider the frequency with  
283 which balancing selection occurs.

## References

- Asthana S, Schmidt S, Sunyaev S (2005) A limited role for balancing selection. *Trends in Genetics* **21**, 30-32.
- Ayala FJ, Campbell CA (1974) Frequency-dependent selection. *Annual Review of Ecology and Systematics* **5**, 115-138.
- Begun DJ, Holloway AK, Stevens K, *et al.* (2007) Population genomics: whole-genome analysis of polymorphism and divergence in *Drosophila simulans*. *PLoS Biology* **5**, e310.
- Bush GL (1975) Modes of animal speciation. *Annual Review of Ecology and Systematics* **6**, 339-364.
- Charlesworth B, Nordborg M, Charlesworth D (1997) The effects of local selection, balanced polymorphism and background selection on equilibrium patterns of genetic diversity in subdivided populations. *Genetical Research* **70**, 155-174.
- Charlesworth D (2006) Balancing selection and its effects on sequences in nearby genome regions. *PLoS Genetics* **2**, 379-384.
- Cheng CD, White BJ, Kamdem C, *et al.* (2012) Ecological genomics of *Anopheles gambiae* along a latitudinal cline: A population-resequencing approach. *Genetics* **190**, 1417-1432.
- Colosimo PF, Hosemann KE, Balabhadra S, *et al.* (2005) Widespread parallel evolution in sticklebacks by repeated fixation of Ectodysplasin alleles. *Science* **307**, 1928-1933.
- Cruickshank TE, Hahn MW (2014) Reanalysis suggests that genomic islands of speciation are due to reduced diversity, not reduced gene flow. *Molecular Ecology* **23**, 3133-3157.
- Ellegren H, Smeds L, Burri R, *et al.* (2012) The genomic landscape of species divergence in *Ficedula* flycatchers. *Nature* **491**, 756-760.
- Fan S, Hansen ME, Lo Y, Tishkoff SA (2016) Going global by adapting local: A review of recent human adaptation. *Science* **354**, 54-59.
- Felsenstein J (1976) The theoretical population genetics of variable selection and migration. *Annual Review of Genetics* **10**, 253-280.
- Fishman L, Stathos A, Beardsley PM, Williams CF, Hill JP (2013) Chromosomal rearrangements and the genetics of reproductive barriers in *Mimulus* (monkey flowers). *Evolution* **67**, 2547-2560.
- Fontaine MC, Pease JB, Steele A, *et al.* (2015) Mosquito genomics. Extensive introgression in a malaria vector species complex revealed by phylogenomics. *Science* **347**, 1258524.
- Geraldes A, Basset P, Smith KL, Nachman MW (2011) Higher differentiation among subspecies of the house mouse (*Mus musculus*) in genomic regions with low recombination. *Molecular Ecology* **20**, 4722-4736.
- Gillespie JH, Langley CH (1979) Are evolutionary rates really variable? *Journal of Molecular Evolution* **13**, 27-34.
- Guerrero RF, Kirkpatrick M (2014) Local adaptation and the evolution of chromosome fusions. *Evolution* **68**, 2747-2756.
- Guerrero RF, Rousset F, Kirkpatrick M (2012) Coalescent patterns for chromosomal inversions in divergent populations. *Philosophical Transactions of the Royal Society London B* **367**, 430-438.
- Han F, Lamichhaney S, Grant BR, *et al.* (2017) Gene flow, ancient polymorphism, and ecological adaptation shape the genomic landscape of divergence among Darwin's finches. *Genome Research* doi: 10.1101/gr.212522.116.
- Kapun M, Fabian DK, Goudet J, Flatt T (2016) Genomic evidence for adaptive inversion clines in *Drosophila melanogaster*. *Molecular Biology and Evolution* **33**, 1317-1336.
- Kirkpatrick M, Barton N (2006) Chromosome inversions, local adaptation and speciation. *Genetics* **173**, 419-434.
- Lamichhaney S, Berglund J, Almen MS, *et al.* (2015) Evolution of Darwin's finches and their beaks revealed by genome sequencing. *Nature* **518**, 371-375.
- Lohse K, Clarke M, Ritchie MG, Etges WJ (2015) Genome-wide tests for introgression between cactophilic *Drosophila* implicate a role of inversions during speciation. *Evolution* **69**, 1178-1190.
- Malinsky M, Challis RJ, Tyers AM, *et al.* (2015) Genomic islands of speciation separate cichlid ecomorphs in an East African crater lake. *Science* **350**, 1493-1498.

- Marques DA, Lucek K, Meier JI, *et al.* (2016) Genomics of rapid incipient speciation in sympatric Threespine Stickleback. *PLoS Genetics* **12**, e1005887.
- Muirhead CA, Glass NL, Slatkin M (2002) Multilocus self-recognition systems in fungi as a cause of trans-species polymorphism. *Genetics* **161**, 633-641.
- Navarro A, Barton NH (2003) Chromosomal speciation and molecular divergence--accelerated evolution in rearranged chromosomes. *Science* **300**, 321-324.
- Nosil P (2012) *Ecological speciation* Oxford University Press, Oxford ; New York.
- Otto SP, Pannell JR, Peichel CL, *et al.* (2011) About PAR: the distinct evolutionary dynamics of the pseudoautosomal region. *Trends in Genetics* **27**, 358-367.
- Phung TN, Huber CD, Lohmueller KE (2016) Determining the effect of natural selection on linked neutral divergence across species. *PLoS Genetics* **12**, e1006199.
- Roux C, Fraisse C, Romiguier J, *et al.* (2016) Shedding light on the grey zone of speciation along a continuum of genomic divergence. *PLoS Biology* **14**, e2000234.
- Simonsen KL, Churchill GA, Aquadro CF (1995) Properties of statistical tests of neutrality for DNA polymorphism data. *Genetics* **141**, 413.
- Turner TL, Hahn MW, Nuzhdin SV (2005) Genomic islands of speciation in *Anopheles gambiae*. *PLoS Biology* **3**, 1572-1578.
- Via S (2001) Sympatric speciation in animals: the ugly duckling grows up. *Trends in Ecology & Evolution* **16**, 381-390.
- Wright S (1931) Evolution in Mendelian populations. *Genetics* **16**, 0097-0159.
- Yang M, He Z, Shi S, Wu CI (2017) Can genomic data alone tell us whether speciation happened with gene flow? *Molecular Ecology* doi: 10.1111/mec.14117.



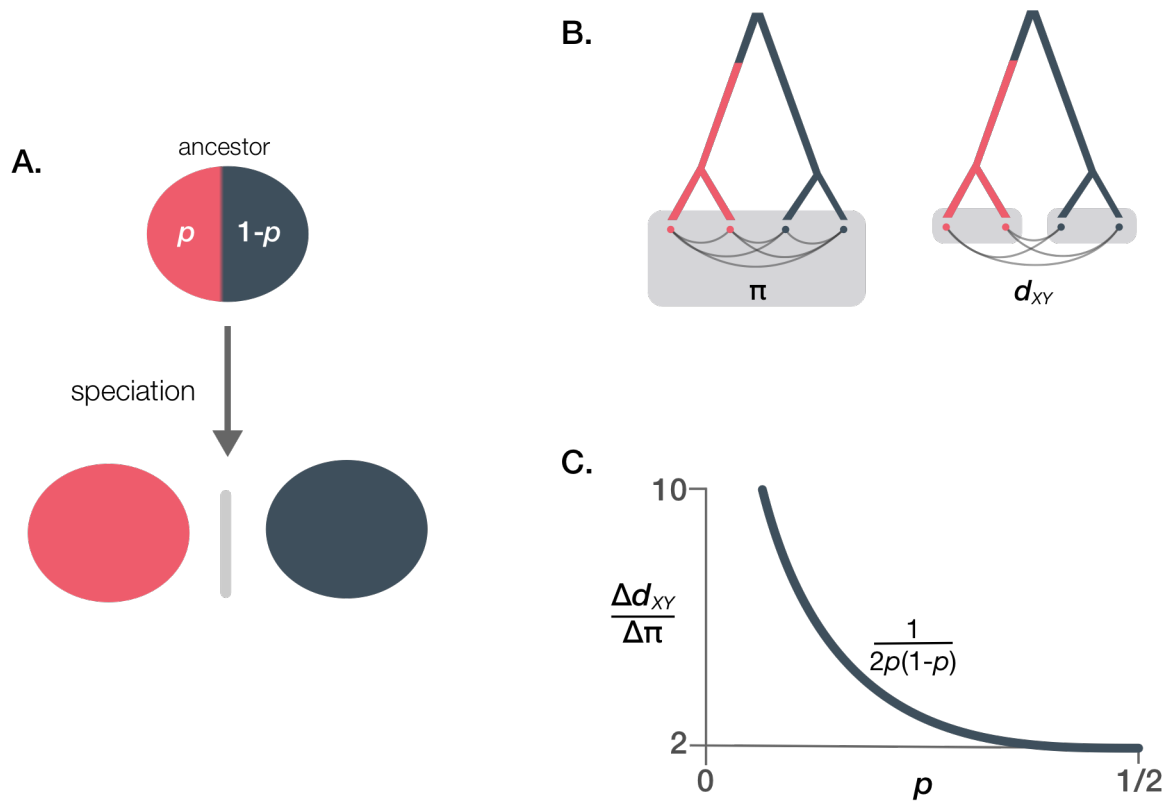

**Figure 1.** A) Schematic of a sieved polymorphism. In the ancestor, two alleles are balanced at frequencies  $p$  and  $1-p$ , and after speciation different alleles fix in descendant lineages. B) The increased power to detect balancing selection stems from the partitioning of the ancestral population imposed by the sieve. While  $\pi$  is a measure of all pairwise distances in a population (left),  $d_{XY}$  compares only samples from different allelic classes (right). C) The ratio of the effect of a balanced polymorphism on diversity ( $\Delta\pi = \pi - \pi_0$ , where  $\pi_0$  is the baseline diversity) and on divergence ( $\Delta d_{XY} = d_{XY} - d_0$ , and  $d_0 = \pi_0$ ) increases as the minor allele becomes rare. As the time since the origin of the polymorphism increases, the ratio converges to the inverse of the expected heterozygosity, *i.e.*,  $1/2p(1-p)$ .

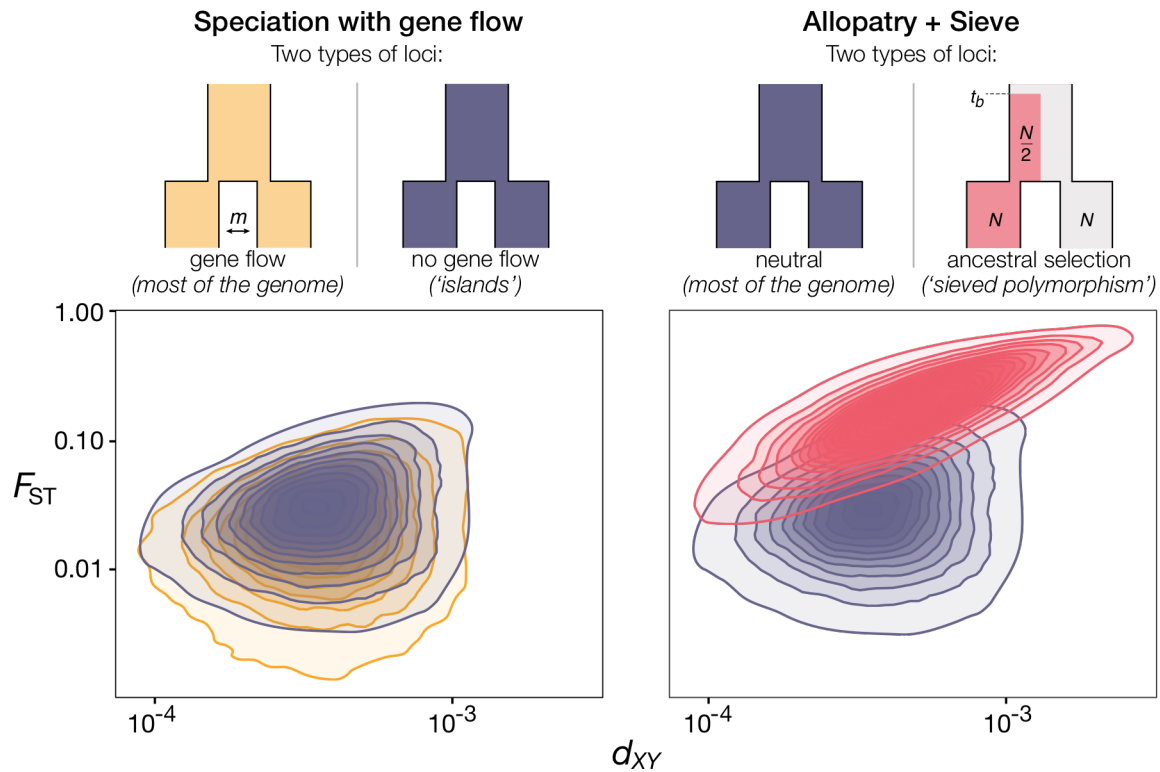

**Figure 2.** Distributions of absolute and relative divergence ( $d_{XY}$  and  $F_{ST}$ ) for genomes under two scenarios of recent speciation (1000 generations ago, population size  $N=10^4$  for each species). In each scenario, genomes have two types of regions. On the left, regions experience differential gene flow since the split: while in most of the genome (in light orange,  $m=0.0001$ ) gene flow prevents divergence, in “speciation islands” (in purple,  $m=0$ ) there is a slight increase in  $F_{ST}$ . On the right, there is no gene flow after speciation, but some regions are tightly linked to a sieved polymorphism (in pink; balanced locus is at  $r=10^{-5}$  from the simulated region, originated  $t_b = 10^4$  generations ago, stable at frequency of  $\frac{1}{2}$  in ancestor, alternative alleles are fixed in descendants). We simulated the genealogy for a sample of 20 chromosomes drawn from each species ( $10^5$  coalescent simulations for each type of genomic region, a 10 Kb non-recombining segment with  $\mu=10^{-8}$ ).
